# Supplementary material for: Colonizing bacteria around aggregated lymphoid tissue of the rat ascending colon change diurnally and affect the host local transcriptome
Source: Research Square preprint supplement (doi:10.21203/rs.3.rs-6052953/v1), 2025-05-28
Supplement: Supplementary file 1 [file 7925c5fbe6f42b9e3cefc7f5.pdf]

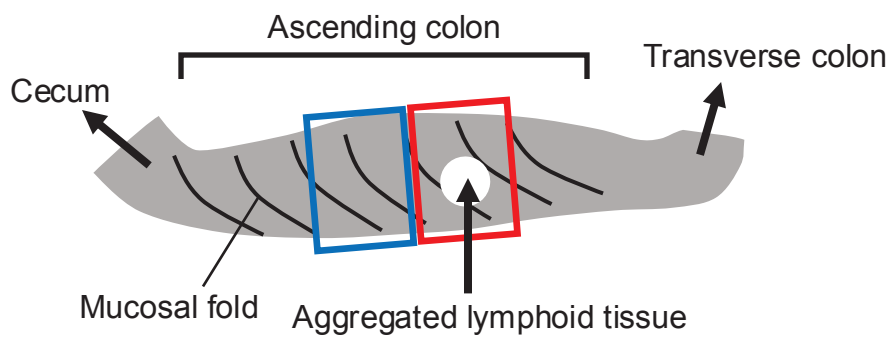

**Supplementary Fig. 1:** The regions dissected from the rat ascending colon in this study. The region including aggregated lymphoid tissue (arrow, red box) and the adjacent area on the cecal side of the aggregated lymphoid tissue (blue box) was dissected for histological analysis.

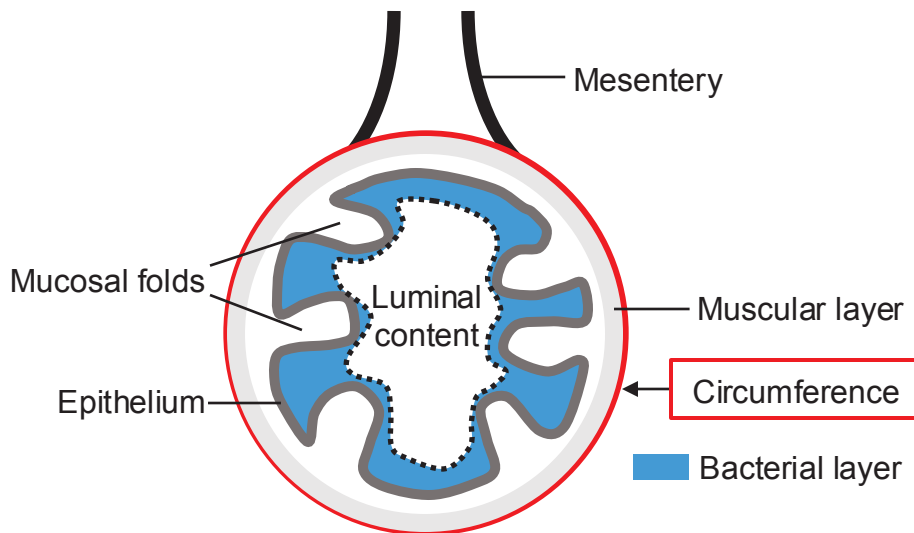

$$\text{Settlement level of indigenous bacteria} = \frac{\text{Total area of the bacterial layer (blue)(mm}^2\text{)}}{\text{Circumference of the intestine (red circle)(mm)}}$$

**Supplementary Fig. 2:** Method of evaluating the settlement level of the indigenous bacteria in the ascending colon. After measuring the total area of the bacterial layer (blue) and the outer circumference of the intestinal tract (red circle), the total area of the bacterial layer (mm<sup>2</sup>) / the length of the outer circumference (mm) was calculated to evaluate the settlement level of the indigenous bacteria.

1. Carefully wash the ascending colon to extract luminal contents
2. Fix with 4% PFA and embed as frozen blocks
3. Make serial tissue sections
4. HE stain to observe the indigenous bacteria and confirm the absence of luminal content

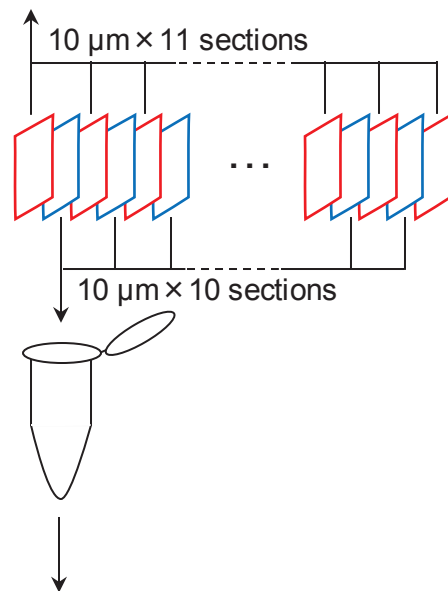

5. DNA extraction, PCR and 16S rRNA amplicon sequencing

**Supplementary Fig. 3:** Workflow in tissue section 16S rRNA amplicon sequencing.

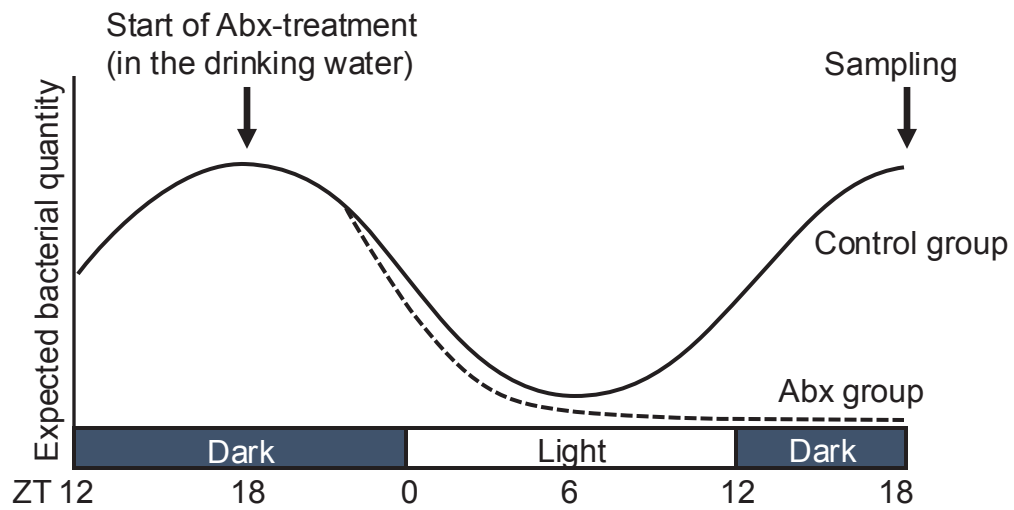

**Supplementary Fig. 4:** Schematic diagram of the 1-day treatment with antibiotics (Abx). The solid line represents the predicted bacterial quantities in the control group, based on the findings of the histological analysis. The dashed line represents the expected bacterial reduction in the antibiotic-treated (Abx) group.



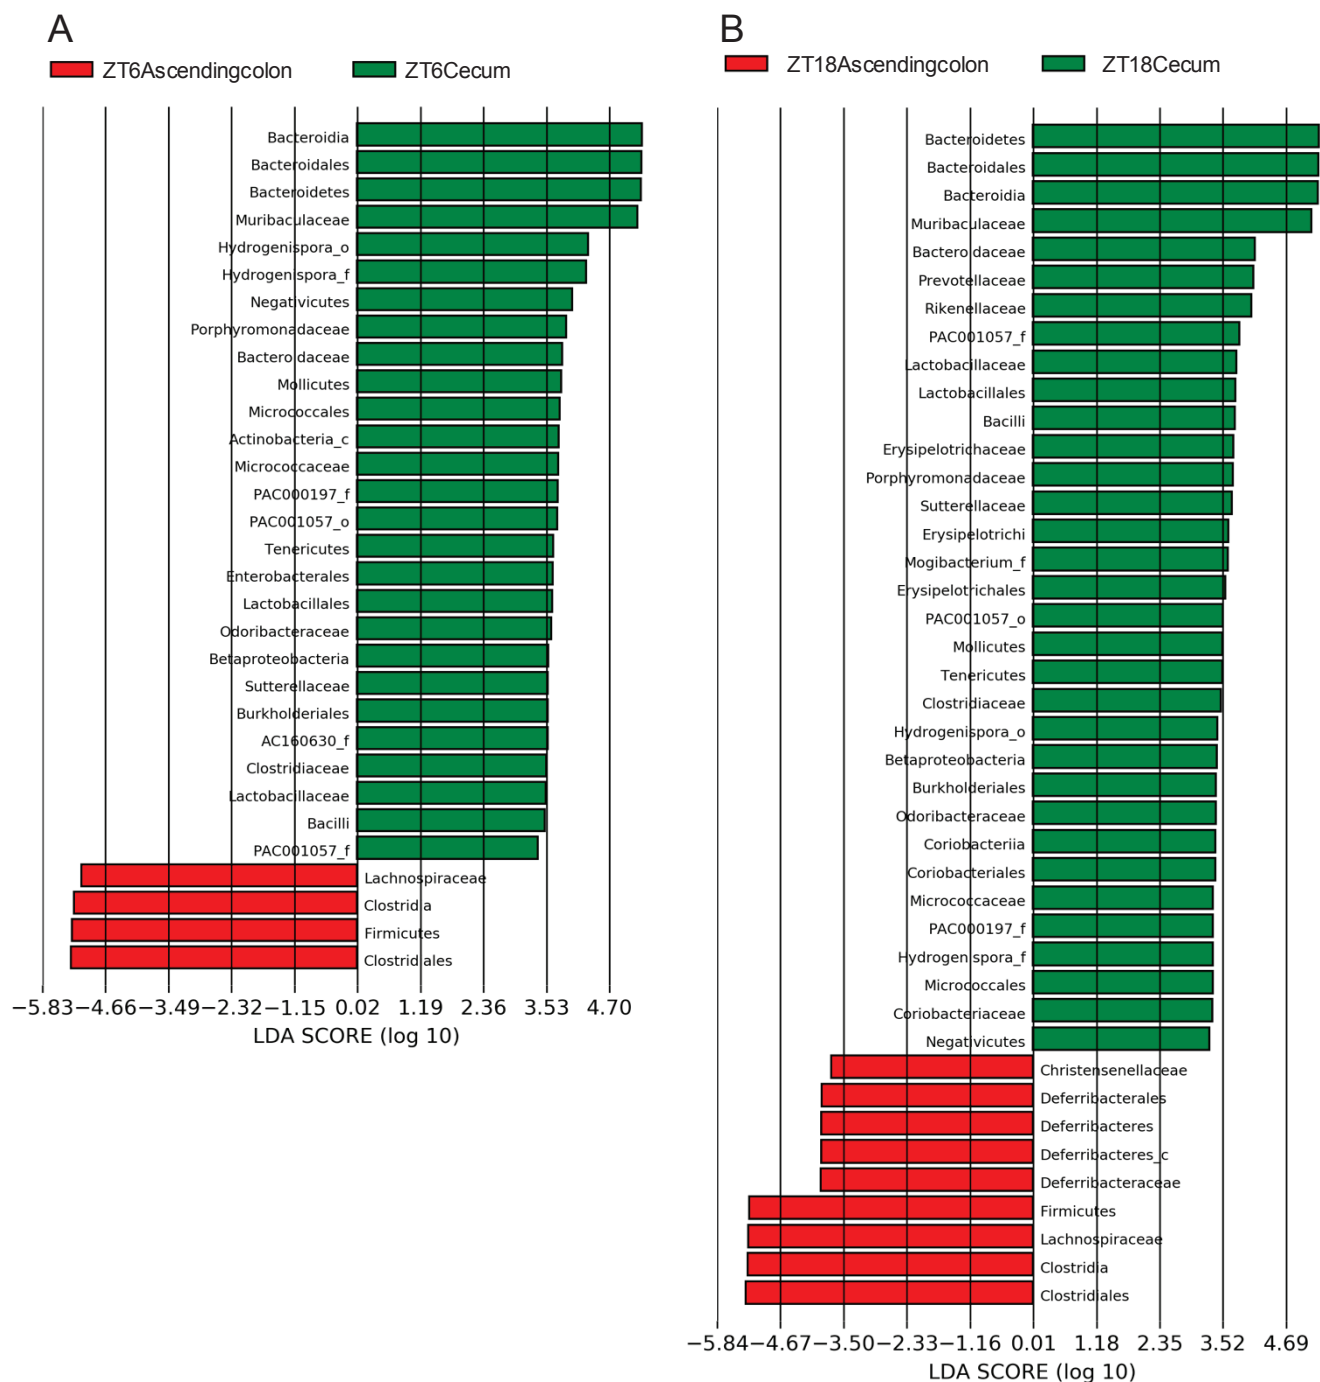

**Supplementary Fig. 5:** Comparison of the relative abundance between the indigenous bacteria of the ascending colon including the ALT-AC and the bacteria in the cecal contents at each taxonomic level (phylum ~ family) by LEfSe analysis.

A) Comparison of the relative abundance between the indigenous bacteria of the ascending colon (red) and the bacteria in the cecal contents (green) at ZT6.

B) Comparison of the relative abundance between the indigenous bacteria of the ascending colon (red) and the bacteria in the cecal contents (green) at ZT18.

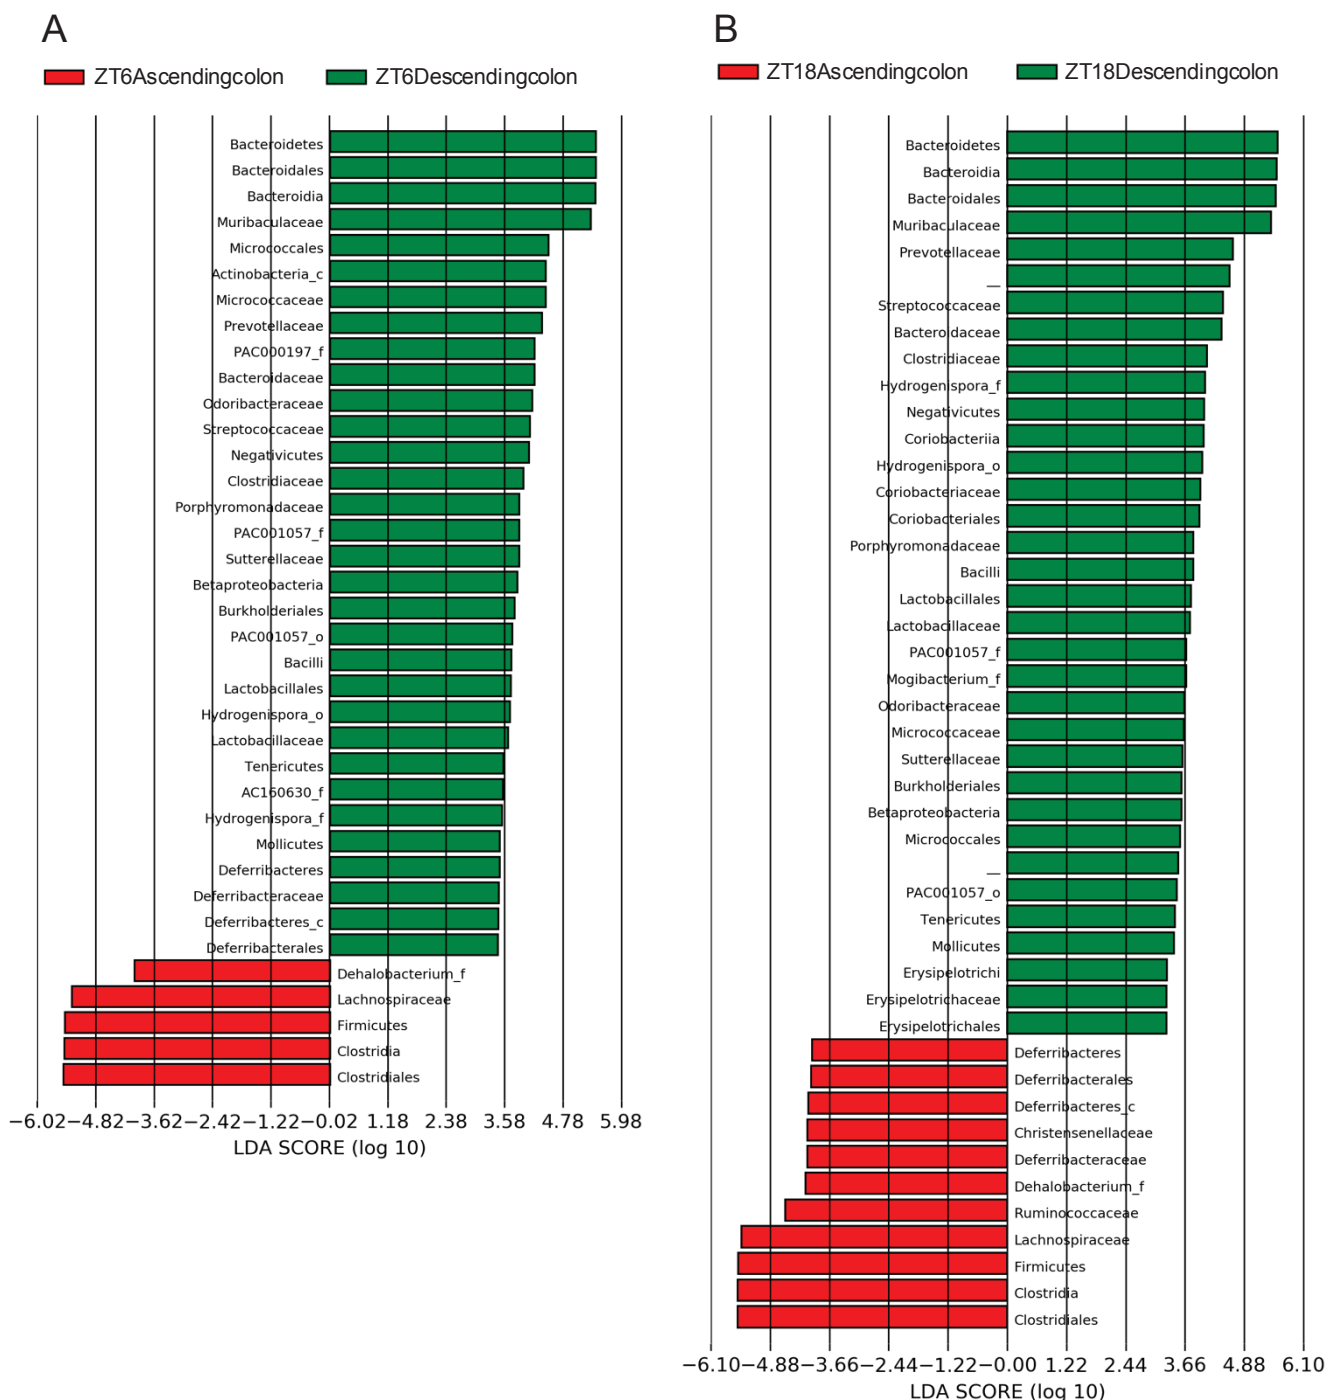

**Supplementary Fig. 6:** Comparison of the relative abundance between the indigenous bacteria of the ascending colon including the ALT-AC and the bacteria in the feces from the descending colon at each taxonomic level (phylum ~ family) by LefSe analysis.

A) Comparison of the relative abundance between the indigenous bacteria of the ascending colon (red) and the bacteria in the feces (green) at ZT6.

B) Comparison of the relative abundance between the indigenous bacteria of the ascending colon (red) and the bacteria in the feces (green) at ZT18.

**Supplementary Table 1:** All down-regulated differentially expressed genes (DEGs) in the Abx treatment group compared with the control group.

|              |            |              |              |                 |              |
|--------------|------------|--------------|--------------|-----------------|--------------|
| Mat2a        | C2cd4b     | Rab37        | Aqp8         | Rgs16           | LOC102550225 |
| Rem2         | Crym       | Serpine1     | Fitm2        | Pcsk9           | Spdef        |
| Crybb1       | Celf3      | LOC103692885 | LOC100912538 | NEWGENE_1310847 | Sgk1         |
| Mettl11b     | Plk3       | LOC102547718 | Mfsd2a       | Fabp4           | Pim3         |
| Slfn4        | Hbegf      | Cbarp        | Col11a2      | Atoh1           | Nup210l      |
| Map3k1       | RGD1311946 | Mast4        | Bhlha15      | Ctgf            | Esco2        |
| LOC100912537 | Clec2d2    | LOC103690018 |              |                 |              |

**Supplementary Table 2:** All up-regulated DEGs in the Abx treatment group compared with the control group.

|              |              |              |              |              |              |
|--------------|--------------|--------------|--------------|--------------|--------------|
| Cyp2b1       | Mt2A         | Capns1       | Agmo         | Efcab6       | Efna1        |
| Cyp3a9       | Oas3         | Drc3         | Irf7         | Apoa1        | Gdpd2        |
| Acer1        | Cideb        | Cyp3a62      | Oas1a        | Ube2l6       | Slc51b       |
| Mt1          | Cyp8b1       | LOC102555576 | Smim24       | Cebpb        | Slc5a9       |
| LOC100364027 | Apoc3        | LOC501266    | LOC108350522 | Dhrs9        | Tmem140      |
| Casr         | Tldc2        | Espn         | LOC103690142 | LOC100360476 | Oas2         |
| Pklr         | Lgals5       | LOC108348140 | Dio1         | Gzma         | Amn          |
| LOC102554372 | Wfdc3        | Isg15        | Fabp2        | Myo1a        | LOC103691958 |
| LOC691320    | LOC689766    | Ckmt1b       | Tubal3       | Tmem246      | Igsf23       |
| Gal3st1      | Mkm2os       | Slc51a       | Dnah11       | Cox7a1       | Apoa4        |
| Ces2         | Mcpt1        | Prl2a1       | Mcpt8l3      | Pink1        | Mcpt8l2      |
| Adtrp        | Prrx1        | Sectm1b      | Cyp4x1       | Bmp3         | Aldh1l1      |
| Zbtb16       | Ephx1        | Bpi          | LOC100360218 | Mall         | Abca12       |
| Cyp27a1      | Gzmf         | Nxf2         | Prlr         | Tcerg1l      | Serpina3n    |
| Slc2a12      | Ascl4        | Frmd1        | Bmp8a        | Mep1b        | Aadat        |
| LOC102546833 | Mep1a        | Spats2l      | C1qtnf5      | RGD1308544   | LOC100912599 |
| LOC108348048 | Best2        | Cck          | Ggt6         | Guca2a       | Rnase12      |
| LOC102550965 | LOC108348093 | Cyp4b1       | Atp8b3       | Gstm7        |              |
